# Supplementary material for: Prebiopsy mp-MRI Can Help to Improve the Predictive Performance in Prostate Cancer: A Prospective Study in 1,478 Consecutive Patients
Source: Oxford University Press journal article supplement (doi:10.1158/1078-0432.ccr-16-2884), 2017-01-31
Supplement: 10780432ccr162884-sup-174756_1_supp_3822567_vjp8vr.docx [file 10780432ccr162884-sup-174756_1_supp_3822567_vjp8vr.docx]

| **Supplementary data 1: the prostate MR imaging parameters at 1.5 T** | | | | |
| --- | --- | --- | --- | --- |
| **Parameters** | **Imaging Sequence** | | | |
| **T2WI** | **DWI** | **DCE*** | **MRSI** |
| Protocol | FSE | SE-EPI | 3D-GRE | 3D-PRESS |
| Repetition time (msec) | 3500 | 3500 | 4.0 | 1000 |
| Echo time | 85 | 56.4 | 1.9 | 130 |
| Field of view (cm2) | 24 | 26 | 36 | 11 |
| Matrix | 320×256 | 128×128 | 256 × 256 × 48 | 16×8×8 |
| Section thickness (mm) | 4 | 5 | 3.8 |  |
| Flip angle (degree) | 90, 180 | 90 | 15 | 180 |
| B value (sec/mm2) | … | 0, 800 | … | … |
| No. of temporal acquisitions | … | … | 15 | … |
